# Supplementary material for: Prediction of Pathologic Response to Neoadjuvant Chemoradiotherapy in Patients with Esophageal Squamous Cell Carcinoma Incorporating Hematological Biomarkers
Source: PubMed Central journal article supplement — Cancer Res Treat. 2020 Sep 4;53(1):172–83. doi: 10.4143/crt.2020.594 (PMC7812014; doi:10.4143/crt.2020.594), 2020-09-04
Supplement: crt-2020-594_S1_Fig.pdf [file crt-2020-594_S1_Fig.pdf]

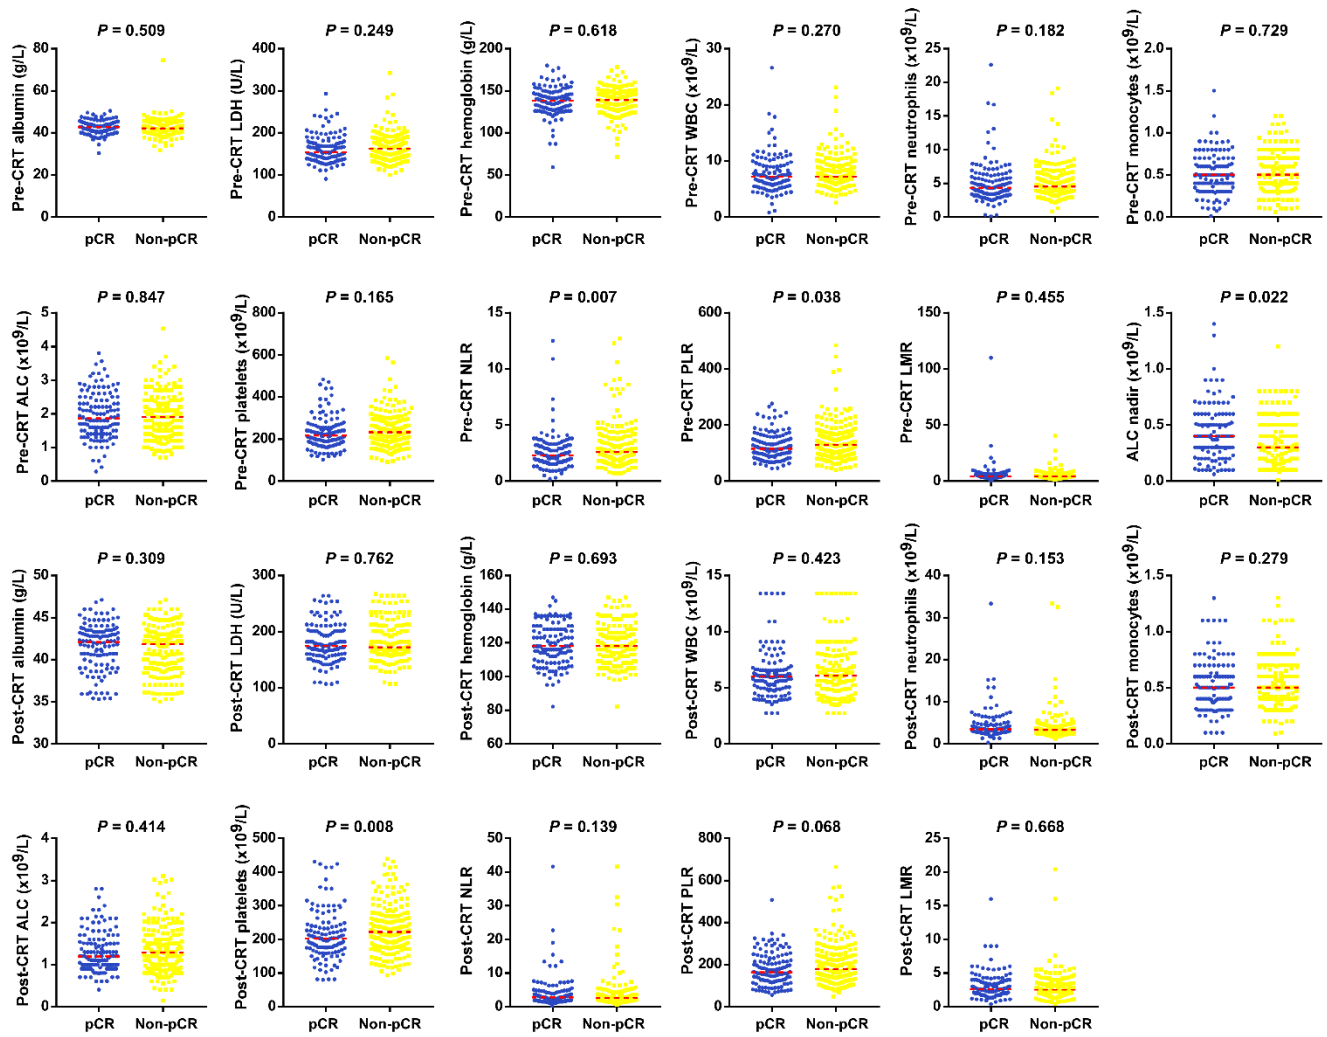

**S1 Fig.** Relationship between value of hematological parameters and pathologic response to neoadjuvant chemoradiotherapy. CRT, chemoradiotherapy; pCR, pathologic complete response; ALC, absolute lymphocyte count; NLR, neutrophil to lymphocyte ratio; PLR, platelet to lymphocyte ratio; LMR, lymphocyte to monocyte ratio; LDH, lactate dehydrogenase; WBC, white blood cell.
