# Supplementary material for: Prediction of Pathologic Response to Neoadjuvant Chemoradiotherapy in Patients with Esophageal Squamous Cell Carcinoma Incorporating Hematological Biomarkers
Source: PubMed Central journal article supplement — Cancer Res Treat. 2020 Sep 4;53(1):172–83. doi: 10.4143/crt.2020.594 (PMC7812014; doi:10.4143/crt.2020.594), 2020-09-04
Supplement: crt-2020-594_S2_Table.pdf [file crt-2020-594_S2_Table.pdf]

**S2 Table.** Spearman's rank correlation analyses among hematological parameters with statistical significance in univariate analysis

|                      | Pre-CRT NLR | Pre-CRT PLR | ALC nadir during CRT | Post-CRT platelets | Post-CRT PLR |
|----------------------|-------------|-------------|----------------------|--------------------|--------------|
| Pre-CRT NLR          | 1.000       | 0.494       | -0.087               | -0.002             | 0.112        |
| Pre-CRT PLR          | 0.494       | 1.000       | -0.078               | -0.017             | 0.008        |
| ALC nadir during CRT | -0.087      | -0.078      | 1.000                | -0.067             | -0.130       |
| Post-CRT platelets   | -0.002      | -0.017      | -0.067               | 1.000              | 0.463        |
| Post-CRT PLR         | 0.112       | 0.008       | -0.130               | 0.463              | 1.000        |

CRT, chemoradiotherapy; NLR, neutrophil to lymphocyte ratio; PLR, platelet to lymphocyte ratio; ALC, absolute lymphocyte count.
