# Supplementary material for: Prediction of Pathologic Response to Neoadjuvant Chemoradiotherapy in Patients with Esophageal Squamous Cell Carcinoma Incorporating Hematological Biomarkers
Source: PubMed Central journal article supplement — Cancer Res Treat. 2020 Sep 4;53(1):172–83. doi: 10.4143/crt.2020.594 (PMC7812014; doi:10.4143/crt.2020.594), 2020-09-04
Supplement: crt-2020-594_S3_Fig.pdf [file crt-2020-594_S3_Fig.pdf]

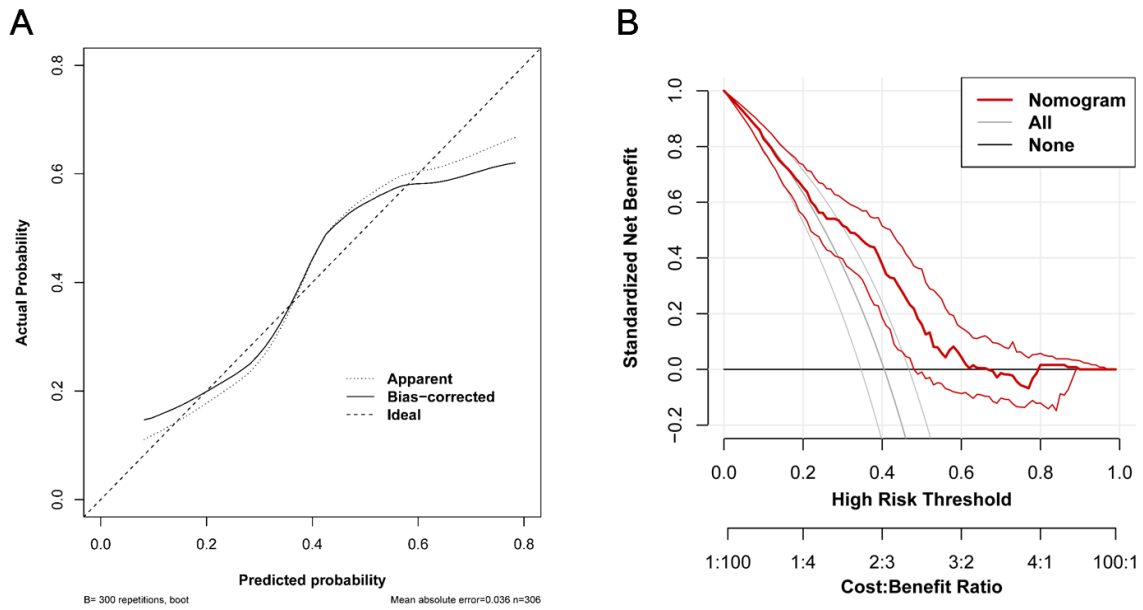

**S3 Fig.** (A) Calibration curve of the nomogram predicting the probability of pathologic complete response (pCR). The x-axis and y-axis show the predicted and actual probabilities of pCR, respectively. (B) Decision curves of the nomogram predicting pCR. The x-axis and y-axis indicate the threshold probabilities and the net benefit, respectively.
