# Supplementary material for: Prediction of Pathologic Response to Neoadjuvant Chemoradiotherapy in Patients with Esophageal Squamous Cell Carcinoma Incorporating Hematological Biomarkers
Source: PubMed Central journal article supplement — Cancer Res Treat. 2020 Sep 4;53(1):172–83. doi: 10.4143/crt.2020.594 (PMC7812014; doi:10.4143/crt.2020.594), 2020-09-04
Supplement: crt-2020-594_S4_Table.pdf [file crt-2020-594_S4_Table.pdf]

**S4 Table.** Comparison of the published nomogram for predicting pathologic complete response in esophageal cancer.

| Study               | Country         | No.               | Histology                       | pCR rate | Parameters included in the nomogram                                                                                                    | AUROC/C-index |
|---------------------|-----------------|-------------------|---------------------------------|----------|----------------------------------------------------------------------------------------------------------------------------------------|---------------|
| Ajani et al. [1]    | USA             | 322               | 6.2%<br>SCC and<br>93.8%<br>AC  | 21.7%    | Sex<br>Baseline T stage<br>Histologic grade<br>Post-CRT SUV<br>Post-CRT biopsy result                                                  | 0.72          |
| Toxopeus et al. [2] | The Netherlands | 381               | 23.4%<br>SCC and<br>76.6%<br>AC | 27.6%    | Sex<br>Histology<br>Histologic grade<br>Baseline T stage                                                                               | 0.69          |
| Chao et al. [3]     | Taiwan          | 274 <sup>a)</sup> | 100%<br>SCC                     | 25.8%    | Age<br>Primary tumor length<br>Previous head and neck cancer history<br>Post-CRT EGD finding + biopsy result<br>Post-CRT albumin level | 0.83          |
| Current study       | China           | 306               | 100%<br>SCC                     | 40.5%    | Sex<br>Chemotherapy regimen<br>Post-CRT EGD finding<br>Pre-CRT NLR<br>ALC nadir during CRT<br>Post-CRT PLR                             | 0.75          |

pCR, pathologic complete response; AUROC, area under the receiver operating characteristic curve; C-index, concordance index; SCC, squamous cell carcinoma; AC, adenocarcinoma; CRT, chemoradiotherapy; SUV, standardized unit value; EGD, esophagogastroduodenoscopy; NLR, neutrophil to lymphocyte ratio; ALC, absolute lymphocyte count, PLR, platelet to lymphocyte ratio. <sup>a)</sup>A total of 274 patients in the training set and 118 in the validation set, respectively.

## References

1. Ajani JA, Correa AM, Hofstetter WL, Rice DC, Blum MA, Suzuki A, et al. Clinical parameters model for predicting pathologic complete response following preoperative chemoradiation in patients with esophageal cancer. *Ann Oncol.* 2012;23:2638-42.
2. Toxopeus EL, Nieboer D, Shapiro J, Biermann K, van der Gaast A, van Rij CM, et al. Nomogram for predicting pathologically complete response after neoadjuvant chemoradiotherapy for oesophageal cancer. *Radiother Oncol.* 2015;115:392-8.
3. Chao YK, Chang HK, Tseng CK, Liu YH, Wen YW. Development of a nomogram for the prediction of pathological complete response after neoadjuvant chemoradiotherapy in patients with esophageal squamous cell carcinoma. *Dis Esophagus.* 2017;30:1-8
